# Supplementary material
Source: publisher figshare collection journal article supplement (https://diabetesjournals.figshare.com/ndownloader/files/34018271)

## Supplementary material:

Glycaemia status at admission and cardiovascular complications in patients hospitalised with COVID-19

Tom Norris, PhD<sup>1,3</sup> [tdn9@leicester.ac.uk](mailto:tdn9@leicester.ac.uk) <sup>†</sup>

Cameron Razieh, MSc<sup>1,2</sup> [cr288@leicester.ac.uk](mailto:cr288@leicester.ac.uk) <sup>†</sup>

Thomas Yates, PhD<sup>1,2</sup> [ty20@leicester.ac.uk](mailto:ty20@leicester.ac.uk)

Francesco Zaccardi, PhD<sup>1,3</sup> [fz43@leicester.ac.uk](mailto:fz43@leicester.ac.uk)

Clare L Gillies, PhD<sup>1,3</sup> [clg13@leicester.ac.uk](mailto:clg13@leicester.ac.uk)

Yogini V Chudasama, PhD<sup>3</sup> [yc244@leicester.ac.uk](mailto:yc244@leicester.ac.uk)

Alex Rowlands, PhD<sup>1,2</sup> [alex.rowlands@leicester.ac.uk](mailto:alex.rowlands@leicester.ac.uk)

Melanie J Davies, MD<sup>1,2</sup> [melanie.davies@uhl-tr.nhs.uk](mailto:melanie.davies@uhl-tr.nhs.uk)

Gerry P McCann, MD<sup>4,2</sup> [gpm12@leicester.ac.uk](mailto:gpm12@leicester.ac.uk)

Amitava Banerjee, MBChB DPhil<sup>5</sup> [ami.banerjee@ucl.ac.uk](mailto:ami.banerjee@ucl.ac.uk)

Annemarie B Docherty PhD<sup>6,7</sup> [annemarie.docherty@ed.ac.uk](mailto:annemarie.docherty@ed.ac.uk)

Peter JM Openshaw, PhD<sup>8</sup> [p.openshaw@imperial.ac.uk](mailto:p.openshaw@imperial.ac.uk)

J Kenneth Baillie, PhD<sup>9</sup> [j.k.baillie@ed.ac.uk](mailto:j.k.baillie@ed.ac.uk)

Malcolm G Semple, PhD<sup>10,11</sup> [M.G.Semple@liverpool.ac.uk](mailto:M.G.Semple@liverpool.ac.uk)

Claire A. Lawson, PhD<sup>1,3</sup> [cl417@leicester.ac.uk](mailto:cl417@leicester.ac.uk) <sup>\*</sup>

Kamlesh Khunti, PhD<sup>1,3,12</sup> [kk22@leicester.ac.uk](mailto:kk22@leicester.ac.uk) <sup>\*</sup>

<sup>†</sup> Joint first author; <sup>\*</sup>Joint senior author

## Contents

### Supplementary Text

|                                                                                                                                                                                                                     |    |
|---------------------------------------------------------------------------------------------------------------------------------------------------------------------------------------------------------------------|----|
| Supplementary text 1. ISARIC4C investigators.....                                                                                                                                                                   | 3  |
| Supplementary text 2. Variable definitions.....                                                                                                                                                                     | 7  |
| Supplementary Table 1. Characteristics of those included in the final sample (n=36 269) vs those excluded for having incomplete exposure, covariate or outcome data (n=80 790) .....                                | 8  |
| Supplementary Table 2. Characteristics of those whose 28 day outcome status was discharged vs remaining in hospital/transferred (n=26 643) .....                                                                    | 9  |
| Supplementary Table 3. Patient characteristics, stratified by glycaemia status (n=36 269) ..                                                                                                                        | 10 |
| Supplementary Figure 1. Flow diagram outlining how final sample was derived.....                                                                                                                                    | 11 |
| Supplementary Figure 2. Associations between glucose level at admission and cardiovascular/renal complications: by ethnicity (adjusted for sex, age, obesity, diabetes status and oxygen saturation) .....          | 12 |
| Supplementary Figure 3. Associations between glucose level at admission and cardiovascular/renal complications: by sex (adjusted for ethnicity, age, obesity, diabetes status and oxygen saturation) .....          | 13 |
| Supplementary Figure 4. Associations between glucose level at admission and cardiovascular/renal complications: by obesity status (adjusted for sex, age, ethnicity, diabetes status and oxygen saturation) .....   | 14 |
| Supplementary Figure 5. Associations between hypo- and hyperglycaemia and cardiovascular/renal complications (adjusted for sex, age, ethnicity, obesity, diabetes status and oxygen saturation) .....               | 15 |
| Supplementary Figure 6. Associations between glucose level at admission and 'any cardiovascular/renal complication or death' .....                                                                                  | 17 |
| Supplementary Figure 7. Associations between glucose level at admission and 'any cardiovascular/renal complication or death', by ethnicity, sex, age, obesity and diabetes status.....                              | 18 |
| Supplementary Figure 8. Associations between hypo- and hyperglycaemia and 'any cardiovascular/renal complication or death' (adjusted for sex, age, ethnicity, diabetes status, obesity and oxygen saturation) ..... | 19 |

## Supplementary text 1. ISARIC4C investigators

### ISARIC4C Investigators

Consortium Lead Investigator: J Kenneth Baillie, Chief Investigator: Malcolm G Semple, Co-Lead Investigator: Peter JM Openshaw. ISARIC Clinical Coordinator: Gail Carson. Co-Investigators: Beatrice Alex, Benjamin Bach, Wendy S Barclay, Debby Bogaert, Meera Chand, Graham S Cooke, Annemarie B Docherty, Jake Dunning, Ana da Silva Filipe, Tom Fletcher, Christopher A Green, Ewen M Harrison, Julian A Hiscox, Antonia Ying Wai Ho, Peter W Horby, Samreen Ijaz, Saye Khoo, Paul Klenerman, Andrew Law, Wei Shen Lim, Alexander J Mentzer, Laura Merson, Alison M Meynert, Mahdad Noursadeghi, Shona C Moore, Massimo Palmarini, William A Paxton, Georgios Pollakis, Nicholas Price, Andrew Rambaut, David L Robertson, Clark D Russell, Vanessa Sancho-Shimizu, Janet T Scott, Thushan de Silva, Louise Sigfrid, Tom Solomon, Shiranee Sriskandan, David Stuart, Charlotte Summers, Richard S Tedder, Emma C Thomson, AA Roger Thompson, Ryan S Thwaites, Lance CW Turtle, Maria Zambon. Project Managers: Hayley Hardwick, Chloe Donohue, Ruth Lyons, Fiona Griffiths, Wilna Oosthuyzen. Data Analysts: Lisa Norman, Riinu Pius, Thomas M Drake, Cameron J Fairfield, Stephen Knight, Kenneth A Mclean, Derek Murphy, Catherine A Shaw. Data and Information System Managers: Jo Dalton, James Lee, Daniel Plotkin, Michelle Girvan, Egle Saviciute, Stephanie Roberts, Janet Harrison, Laura Marsh, Marie Connor, Sophie Halpin, Clare Jackson, Carrol Gamble. Data integration and presentation: Gary Leeming, Andrew Law, Murray Wham, Sara Clohisey, Ross Hendry, James Scott-Brown. Material Management: William Greenhalf, Victoria Shaw, Sarah McDonald. Patient engagement: Seán Keating, Outbreak Laboratory Staff and Volunteers: Katie A.

Ahmed, Jane A Armstrong, Milton Ashworth, Innocent G Asimwe, Siddharth Bakshi, Samantha L Barlow, Laura Booth, Benjamin Brennan, Katie Bullock, Benjamin WA Catterall, Jordan J Clark, Emily A Clarke, Sarah Cole, Louise Cooper, Helen Cox, Christopher Davis, Oslem Dincarslan, Chris Dunn, Philip Dyer, Angela Elliott, Anthony Evans, Lorna Finch, Lewis WS Fisher, Terry Foster, Isabel Garcia-Dorival, William Greenhalf, Philip Gunning, Catherine Hartley, Antonia Ho, Rebecca L Jensen, Christopher B Jones, Trevor R Jones, Shadia Khandaker, Katharine King, Robyn T. Kiy, Chrysa Koukorava, Annette Lake, Suzannah Lant, Diane Latawiec, L Lavelle-Langham, Daniella Lefteri, Lauren Lett, Lucia A Livoti, Maria Mancini, Sarah McDonald, Laurence McEvoy, John McLauchlan, Soeren Metelmann, Nahida S Miah, Joanna Middleton, Joyce Mitchell, Shona C Moore, Ellen G Murphy, Rebekah Penrice-Randal, Jack Pilgrim, Tessa Prince, Will Reynolds, P. Matthew Ridley, Debby Sales, Victoria E Shaw, Rebecca K Shears, Benjamin Small, Krishanthi S Subramaniam, Agnieska Szemiel, Aislynn Taggart, Jolanta Tanianis-Hughes, Jordan Thomas, Erwan Trochu, Libby van Tonder, Eve Wilcock, J. Eunice Zhang. Local Principal Investigators: Kayode Adeniji, Daniel Agranoff, Ken Agwuh, Dhiraj Ail, Ana Alegria, Brian Angus, Abdul Ashish, Dougal Atkinson, Shahedal Bari, Gavin Barlow, Stella Barnass, Nicholas Barrett, Christopher Bassford, David Baxter, Michael Beadsworth, Jolanta Bernatoniene, John Berridge, Nicola Best, Pieter Bothma, David Brealey, Robin Brittain-Long, Naomi Bulteel, Tom Burden, Andrew Burtenshaw, Vikki Caruth, David Chadwick, Duncan Chambler, Nigel Chee, Jenny Child, Srikanth Chukkambotla, Tom Clark, Paul Collini, Catherine Cosgrove, Jason Cupitt, Maria-Teresa Cutino-Moguel, Paul Dark, Chris Dawson, Samir Dervisevic, Phil Donnison, Sam Douthwaite, Ingrid DuRand, Ahilanadan Dushianthan, Tristan Dyer, Cariad Evans, Chi Eziefula, Chrisopher Fegan, Adam Finn, Duncan Fullerton,

Sanjeev Garg, Sanjeev Garg, Atul Garg, Effrossyni Gkrania-Klotsas, Jo Godden, Arthur Goldsmith, Clive Graham, Elaine Hardy, Stuart Hartshorn, Daniel Harvey, Peter Havalda, Daniel B Hawcutt, Maria Hobrok, Luke Hodgson, Anil Hormis, Michael Jacobs, Susan Jain, Paul Jennings, Agilan Kaliappan, Vidya Kasipandian, Stephen Kegg, Michael Kelsey, Jason Kendall, Caroline Kerrison, Ian Kerslake, Oliver Koch, Gouri Koduri, George Koshy, Shondipon Laha, Steven Laird, Susan Larkin, Tamas Leiner, Patrick Lillie, James Limb, Vanessa Linnett, Jeff Little, Michael MacMahon, Emily MacNaughton, Ravish Mankregod, Huw Masson, Elijah Matovu, Katherine McCullough, Ruth McEwen, Manjula Meda, Gary Mills, Jane Minton, Mariyam Mirfenderesky, Kavya Mohandas, Quen Mok, James Moon, Elinoor Moore, Patrick Morgan, Craig Morris, Katherine Mortimore, Samuel Moses, Mbiye Mpenge, Rohinton Mulla, Michael Murphy, Megan Nagel, Thapas Nagarajan, Mark Nelson, Igor Otahal, Mark Pais, Selva Panchatsharam, Hassan Paraiso, Brij Patel, Natalie Pattison, Justin Pepperell, Mark Peters, Mandeep Phull, Stefania Pintus, Jagtur Singh Pooni, Frank Post, David Price, Rachel Prout, Nikolas Rae, Henrik Reschreiter, Tim Reynolds, Neil Richardson, Mark Roberts, Devender Roberts, Alistair Rose, Guy Rousseau, Brendan Ryan, Taranprit Saluja, Aarti Shah, Prad Shanmuga, Anil Sharma, Anna Shawcross, Jeremy Sizer, Manu Shankar-Hari, Richard Smith, Catherine Snelson, Nick Spittle, Nikki Staines, Tom Stambach, Richard Stewart, Pradeep Subudhi, Tamas Szakmany, Kate Tatham, Jo Thomas, Chris Thompson, Robert Thompson, Ascanio Tridente, Darell Tupper-Carey, Mary Twagira, Andrew Ustianowski, Nick Vallotton, Lisa Vincent-Smith, Shico Visuvanathan, Alan Vuylsteke, Sam Waddy, Rachel Wake, Andrew Walden, Ingeborg Welters, Tony Whitehouse, Paul Whittaker, Ashley Whittington, Meme Wijesinghe, Martin Williams, Lawrence Wilson, Sarah Wilson, Stephen Winchester,

Martin Wiselka, Adam Wolverson, Daniel G Wooton, Andrew Workman, Bryan Yates, and Peter Young.

## Supplementary text 2. Variable definitions

### *Cardiovascular and renal complications:*

Stroke was based on a clinical diagnosis, with or without supportive radiological findings. Heart failure was defined as failure of the heart to pump a sufficient amount of blood to meet the needs of the body tissues, resulting in tissue congestion and oedema. Cardiac arrhythmia was defined as presence of arrhythmia in those without a previous record of it. Cardiac ischaemia was defined as diminished blood and oxygen supply to the heart muscle, also known as myocardial ischemia and was confirmed by an electrocardiogram (showing ischaemic changes, e.g. ST depression or elevation) and/or cardiac enzyme elevation. Cardiac arrest referred to the sudden cessation of cardiac activity. Coagulation disorder was defined as abnormal coagulation identified by abnormal prothrombin time or activated partial thromboplastin time. Acute renal injury was defined as urine volume <0.5 mL/kg/hour for 6 hours or as a creatinine rise which corresponded to the Kidney Disease Improving Global Outcomes (KDIGO) stage I or above definition (increase in serum creatinine by  $\geq 0.3$  mg/dL ( $\geq 26.5$   $\mu\text{mol/L}$ ) within 48 hours; increase in serum creatinine to  $\geq 1.5$  times baseline, which is known or presumed to have occurred within the prior 7 days)<sup>1</sup>.

1. Kellum JA, Lameire N, Aspelin P, Barsoum RS, Burdmann EA, Goldstein SL, Herzog CA, Joannidis M, Kribben A, Levey AS. Kidney disease: improving global outcomes (KDIGO) acute kidney injury work group. KDIGO clinical practice guideline for acute kidney injury. *Kidney international supplements* 2012;2(1):1-138.

Supplementary Table 1. Characteristics of those included in the final sample (n=36 269) vs those excluded for having incomplete exposure, covariate or outcome data (n=80 790)

|                                                             | Included in final sample (n=36 269) |               | Excluded due to incomplete data (n=80 790) |               | Standardised difference† |
|-------------------------------------------------------------|-------------------------------------|---------------|--------------------------------------------|---------------|--------------------------|
|                                                             | <i>total n</i>                      |               | <i>total n</i>                             |               |                          |
| Sex (male, n (%))                                           | 36 269                              | 20 591 (56.8) | 80 790                                     | 43 243 (53.5) | 0.07                     |
| Age (years, mean (SD))                                      | 36 269                              | 68.6 (16.9)   | 80 790                                     | 70.8 (17.4)   | 0.13                     |
| Ethnicity (n (%))                                           |                                     |               |                                            |               |                          |
| White British                                               |                                     | 29 580 (81.6) |                                            | 69 153 (85.6) |                          |
| South Asian                                                 | 36 269                              | 2 637 (7.3)   | 80 790                                     | 4 158 (5.2)   | 0.12                     |
| Black                                                       |                                     | 1 285 (3.5)   |                                            | 2 017 (2.5)   |                          |
| Other                                                       |                                     | 2 767 (7.6)   |                                            | 5 462 (6.8)   |                          |
| Glucose level on admission (mmol/l, mean (SD))              | 36 269                              | 8.1 (4.3)     | 11 587                                     | 8.7 (4.9)     | 0.13                     |
| In-hospital cardiovascular/renal complications (yes, n (%)) | 36 269                              | 10 421 (28.7) | 69 365                                     | 17 545 (25.3) | 0.08                     |
| Obesity (yes, n (%))                                        | 36 269                              | 5 680 (15.7)  | 60 305                                     | 7 502 (12.4)  | 0.09                     |
| Pre-existing diabetes (yes, n (%))                          | 36 269                              | 9 202 (25.4)  | 66 221                                     | 12 651 (19.1) | 0.15                     |

\*Chi<sup>2</sup> was used for proportions; Student's t test/Wilcoxon rank sum for continuous variables.† Standardized difference = difference in means or proportions divided by standard error; imbalance defined as absolute value greater than 0.10



Supplementary Table 2. Characteristics of those whose 28 day outcome status was discharged vs remaining in hospital/transferred (n=26 643)

|                                                | Status at 28 days         |                                                                           | Standardised difference† |
|------------------------------------------------|---------------------------|---------------------------------------------------------------------------|--------------------------|
|                                                | Discharged<br>(n= 24 152) | Remaining in hospital or transferred to<br>another facility<br>(n= 2 491) |                          |
| Sex (male, n (%))                              | 13 163 (54.5)             | 1 460 (58.6)                                                              | 0.08                     |
| Age (years, mean (SD))                         | 65.0 (17.4)               | 70.0 (16.1)                                                               | 0.29                     |
| Ethnicity (n (%))                              |                           |                                                                           |                          |
| White British                                  | 19 360 (80.2)             | 2 000 (80.3)                                                              | 0.04                     |
| South Asian                                    | 1 898 (7.9)               | 172 (6.9)                                                                 |                          |
| Black                                          | 913 (3.8)                 | 100 (4.0)                                                                 |                          |
| Other                                          | 1 981 (8.2)               | 219 (8.8)                                                                 |                          |
| Glucose level on admission (mmol/l, mean (SD)) | 7.9 (4.1)                 | 8.3 (4.5)                                                                 | 0.11                     |
| (mg/dL, mean (SD))                             | 142.2 (73.8)              | 149.4 (81)                                                                |                          |
| In-hospital cardiovascular/renal complications | 4 708 (19.5)              | 1 021 (41.0)                                                              | 0.48                     |
| Obesity (yes, n (%))                           | 3 897 (16.1)              | 427 (17.1)                                                                | 0.03                     |
| Pre-existing diabetes (yes, n (%))             | 5 687 (23.6)              | 661 (26.5)                                                                | 0.07                     |

†Standardised difference = difference in means or proportions divided by standard error; imbalance defined as absolute value greater than 0.1

Supplementary Table 3. Patient characteristics, stratified by glycaemia status (n=36 269)

|                                                       | Patients with admission<br>glucose <3.9 mmol/l (n=450) | Patients with admission<br>glucose ≥3.9 & <11.1 mmol/l<br>(n=30 760) | Patients with admission<br>glucose ≥11.1 mmol/l (n=5 059) |
|-------------------------------------------------------|--------------------------------------------------------|----------------------------------------------------------------------|-----------------------------------------------------------|
| Sex                                                   |                                                        |                                                                      |                                                           |
| Male                                                  | 232 (51.6)                                             | 17 194 (55.9)                                                        | 3 165 (62.6)                                              |
| Female                                                | 218 (48.4)                                             | 13 566 (44.1)                                                        | 1 894 (37.4)                                              |
| Age on admission (years)                              | 75 (63, 84)                                            | 72 (57, 83)                                                          | 68 (56, 79)                                               |
| <i>Ethnicity</i>                                      |                                                        |                                                                      |                                                           |
| White                                                 | 375 (83.3)                                             | 25 554 (83.1)                                                        | 3 651 (72.2)                                              |
| South Asian                                           | 29 (6.4)                                               | 2 032 (6.6)                                                          | 576 (11.4)                                                |
| Black                                                 | 12 (2.7)                                               | 946 (3.1)                                                            | 327 (6.5)                                                 |
| Other                                                 | 34 (7.6)                                               | 2 228 (7.2)                                                          | 505 (10.0)                                                |
| <i>In-hospital cardiovascular/renal complications</i> |                                                        |                                                                      |                                                           |
| Arrhythmia                                            | 35 (7.8)                                               | 2 422 (7.9)                                                          | 510 (10.1)                                                |
| Cardiac ischaemia                                     | 10 (2.2)                                               | 415 (1.4)                                                            | 126 (2.5)                                                 |
| Cardiac arrest                                        | 12 (2.7)                                               | 709 (2.3)                                                            | 199 (3.9)                                                 |
| Coagulation complications                             | 18 (4.0)                                               | 1 342 (4.4)                                                          | 265 (5.2)                                                 |
| Stroke                                                | -                                                      | 378 (1.2)                                                            | 88 (1.7)                                                  |
| Heart failure                                         | 25 (5.6)                                               | 1 042 (3.4)                                                          | 215 (4.3)                                                 |
| Renal injury                                          | 97 (21.6)                                              | 5 023 (16.3)                                                         | 1 338 (26.5)                                              |
| Glucose on admission (mmol/l)                         | 3.3 (2.7, 3.6)                                         | 6.5 (5.7, 7.6)                                                       | 14.7 (12.5, 18.5)                                         |
| mg/dL                                                 | 59.4 (48.6, 64.8)                                      | 117.0 (102.6, 136.8)                                                 | 264.6 (225.0, 333.0)                                      |
| Obesity                                               | 65 (14.4)                                              | 4 505 (14.7)                                                         | 1 110 (21.9)                                              |
| Pre-existing diabetes                                 | 203 (45.1)                                             | 5 535 (18.0)                                                         | 3 464 (68.5)                                              |

Data are reported as n(%) for categorical variables and median(IQR) for continuous variables

Supplementary Figure 1. Flow diagram outlining how final sample was derived

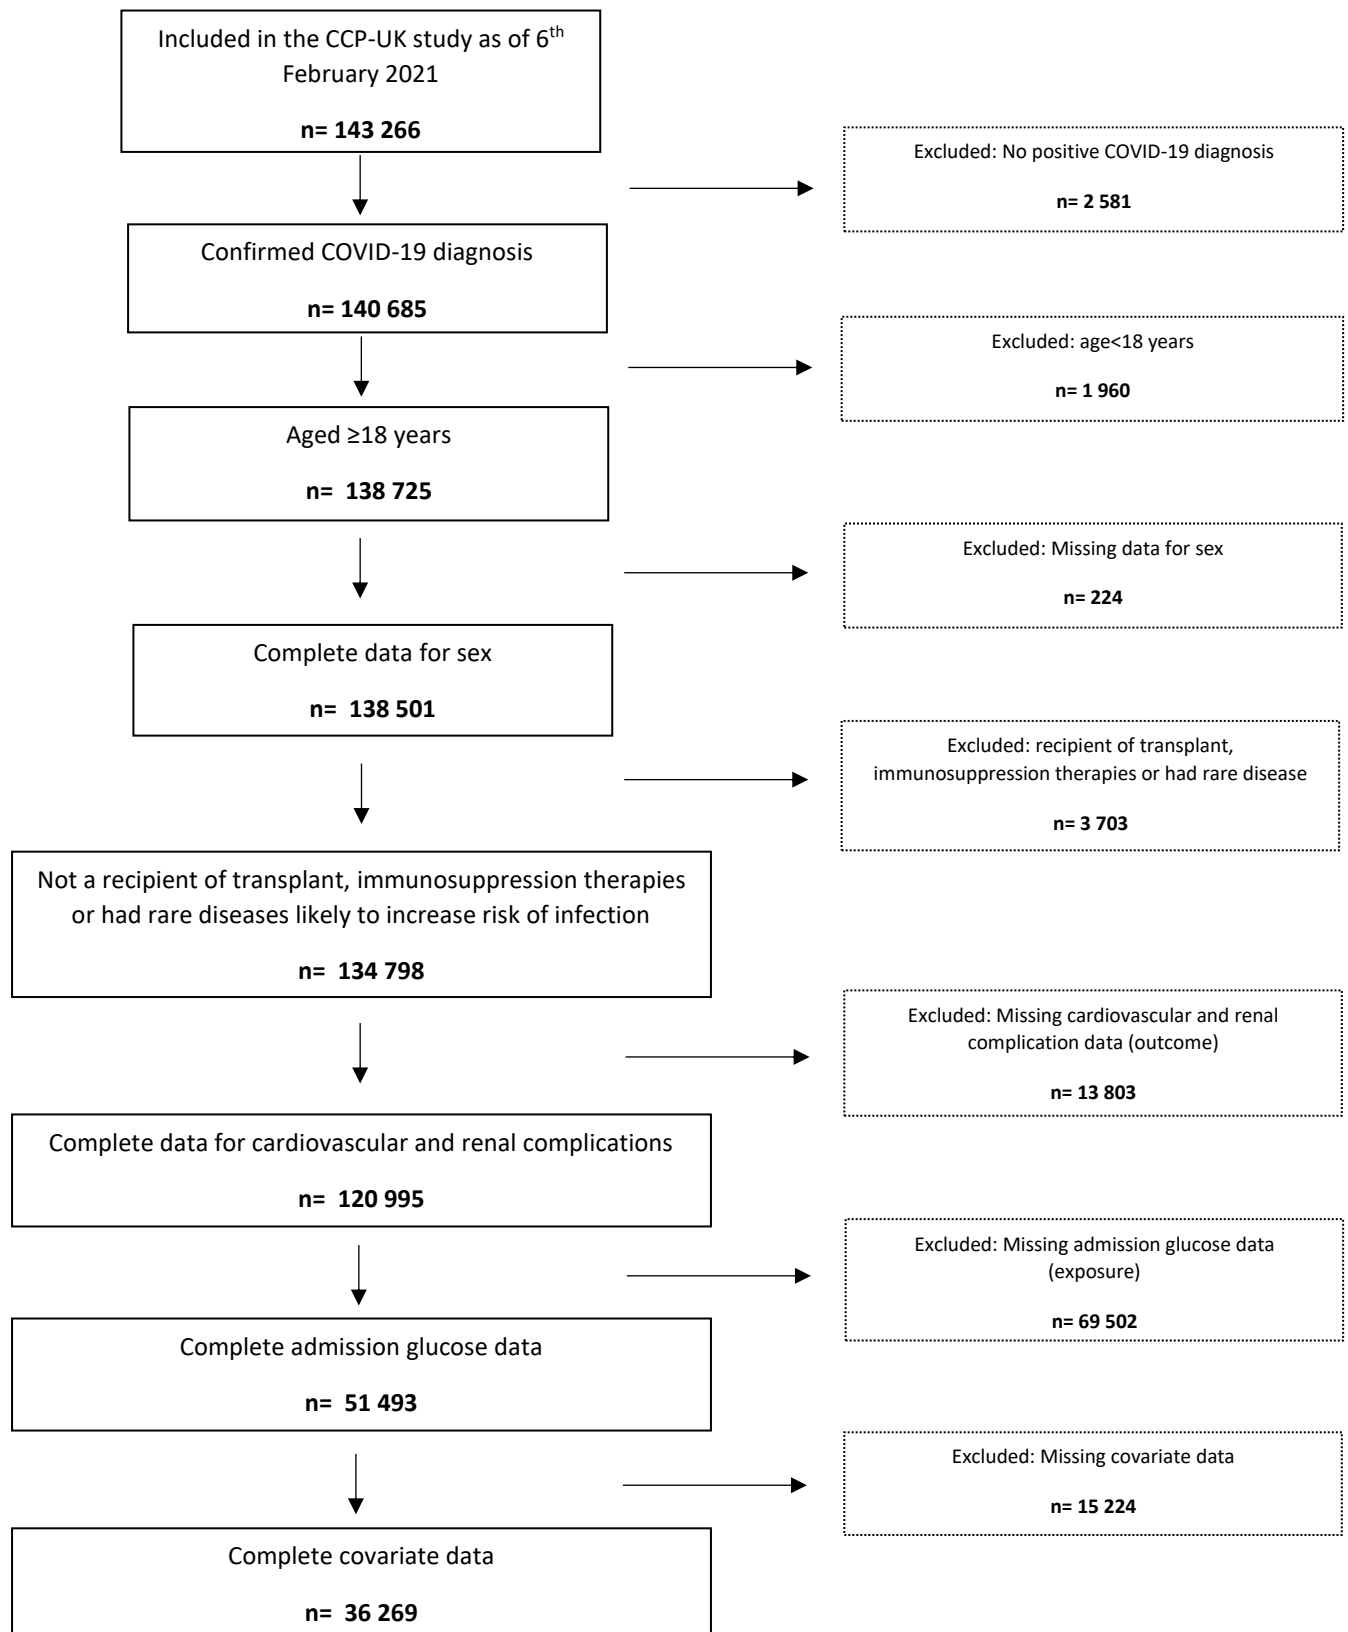

Supplementary Figure 2. Associations between glucose level at admission and cardiovascular/renal complications: by ethnicity (adjusted for sex, age, obesity, diabetes status and oxygen saturation)

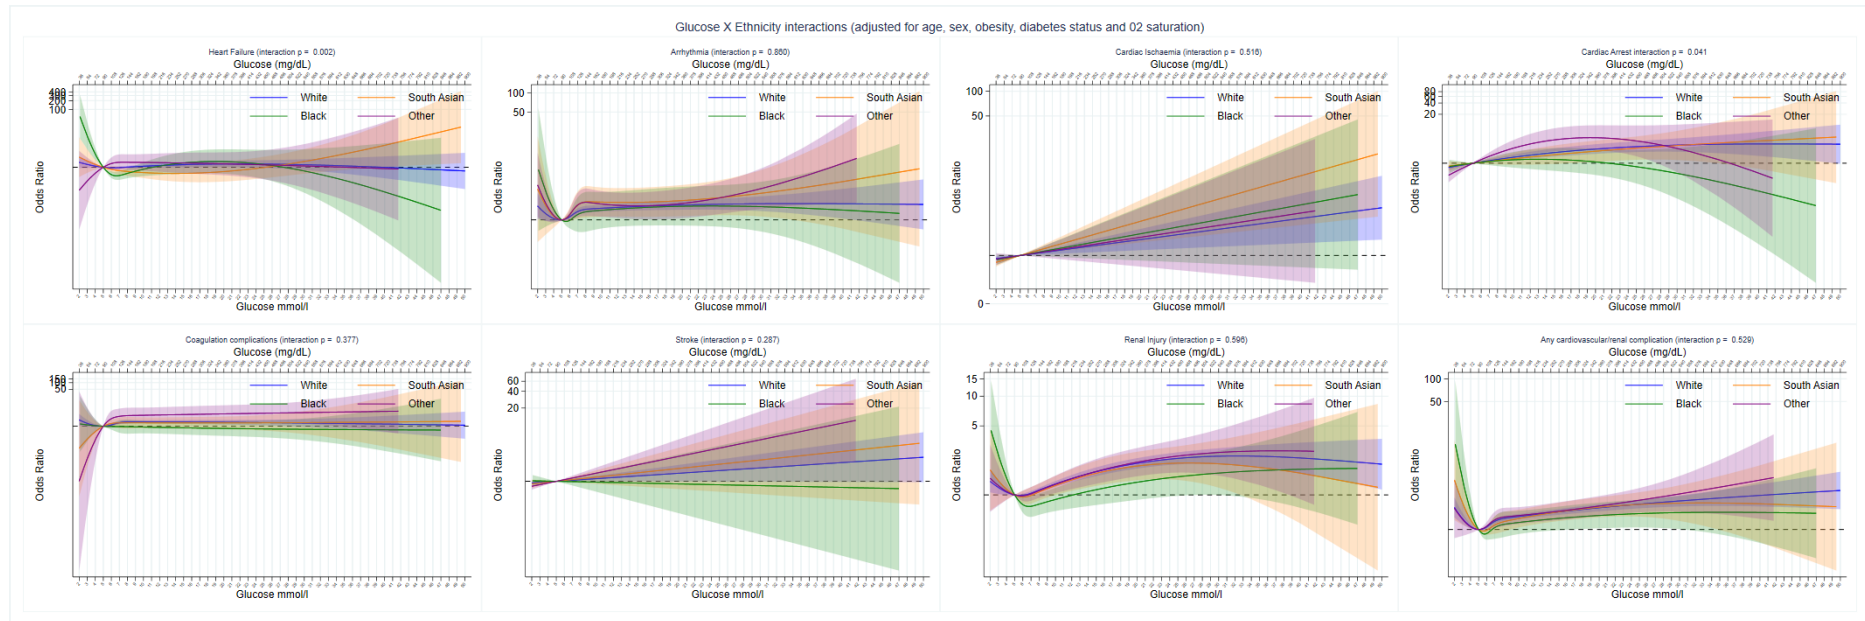

Supplementary Figure 3. Associations between glucose level at admission and cardiovascular/renal complications: by sex (adjusted for ethnicity, age, obesity, diabetes status and oxygen saturation)

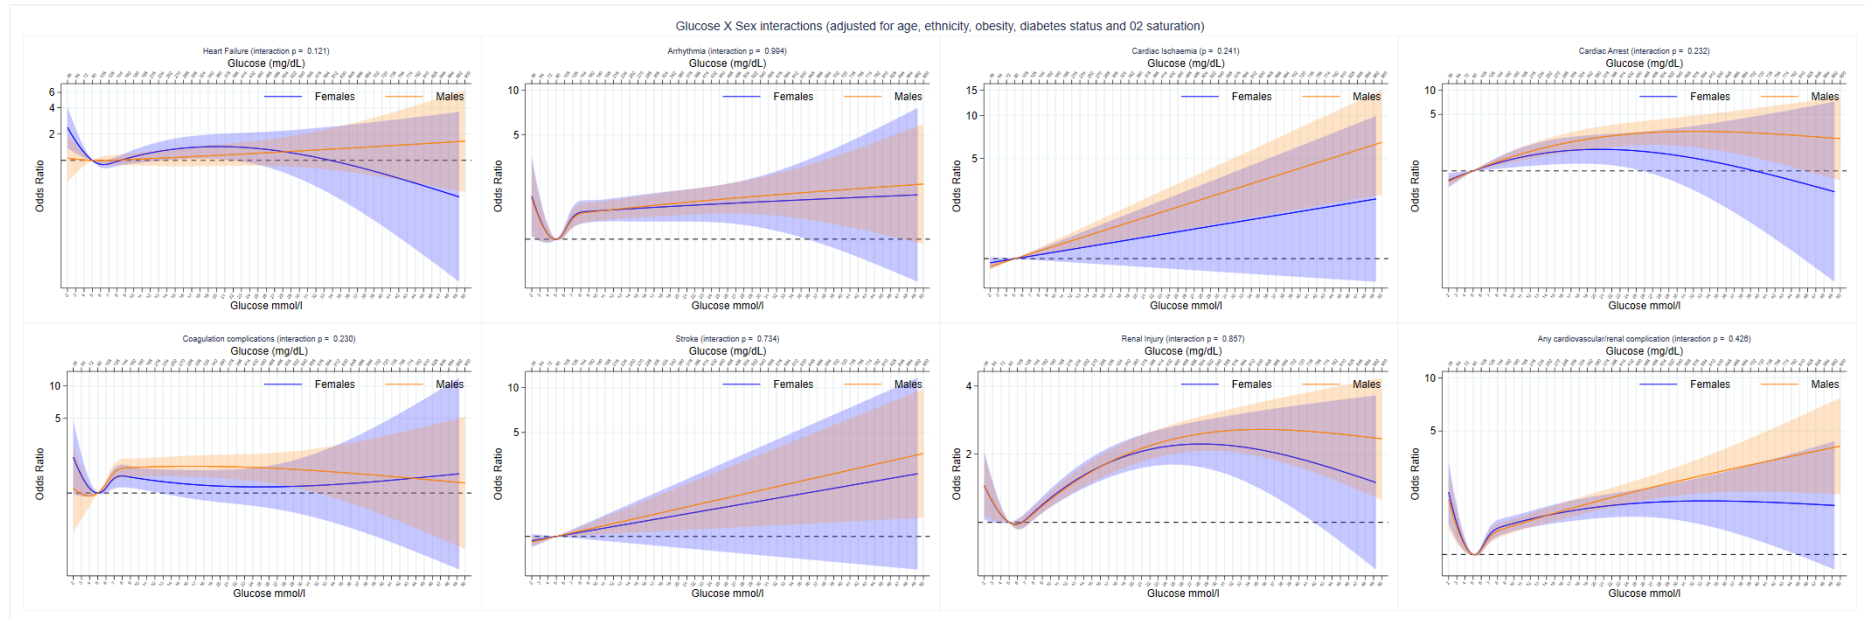

Supplementary Figure 4. Associations between glucose level at admission and cardiovascular/renal complications: by obesity status (adjusted for sex, age, ethnicity, diabetes status and oxygen saturation)

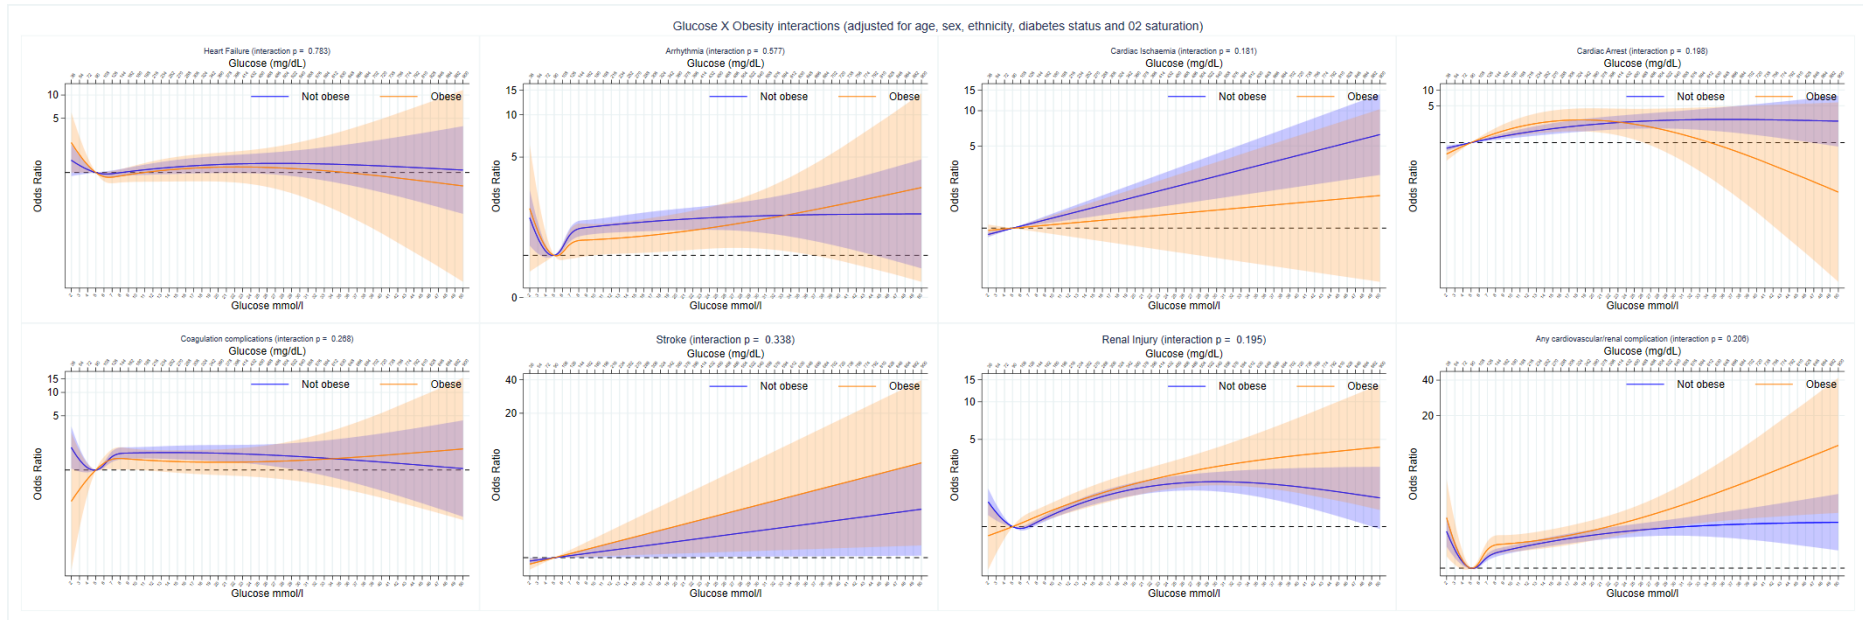

Supplementary Figure 5. Associations between hypo- and hyperglycaemia and cardiovascular/renal complications (adjusted for sex, age, ethnicity, obesity, diabetes status and oxygen saturation)

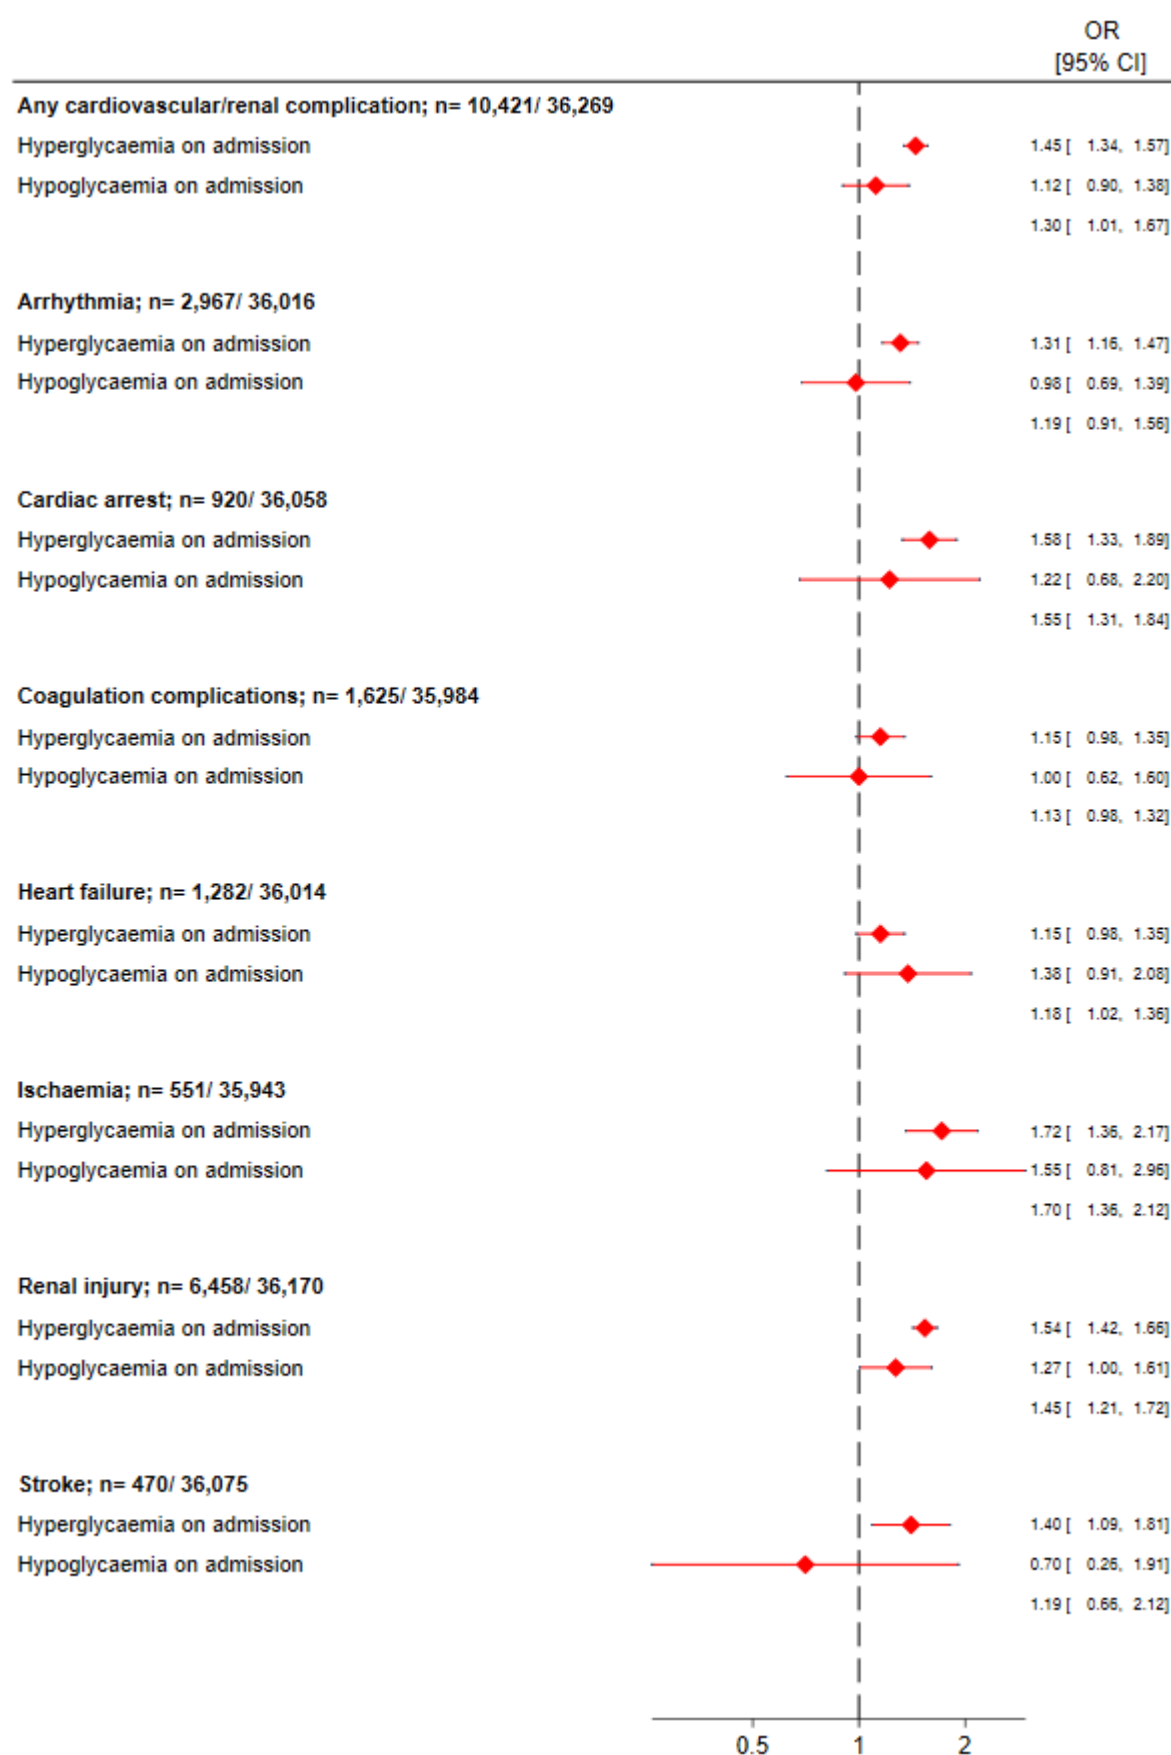



Supplementary Figure 6. Associations between glucose level at admission and 'any cardiovascular/renal complication or death'

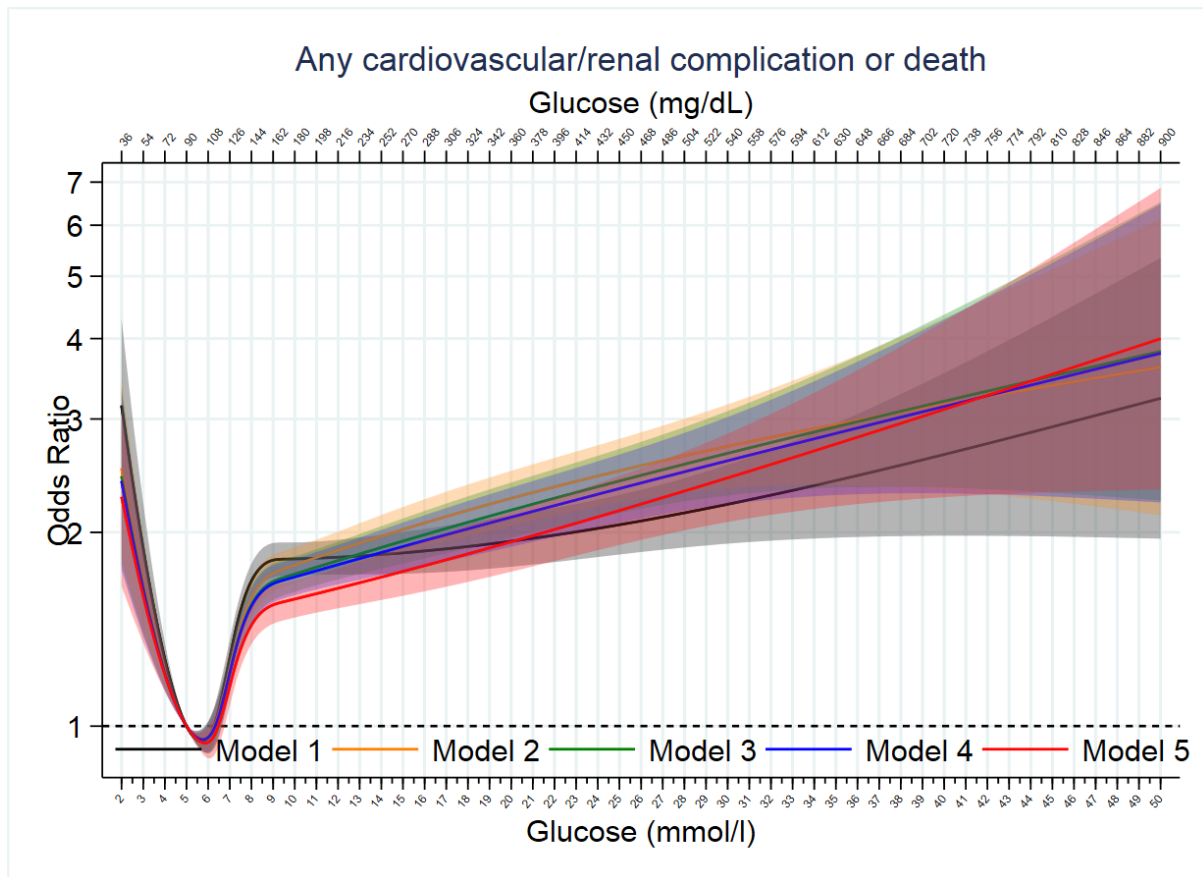

Supplementary Figure 7. Associations between glucose level at admission and ‘any cardiovascular/renal complication or death’, by ethnicity, sex, age, obesity and diabetes status

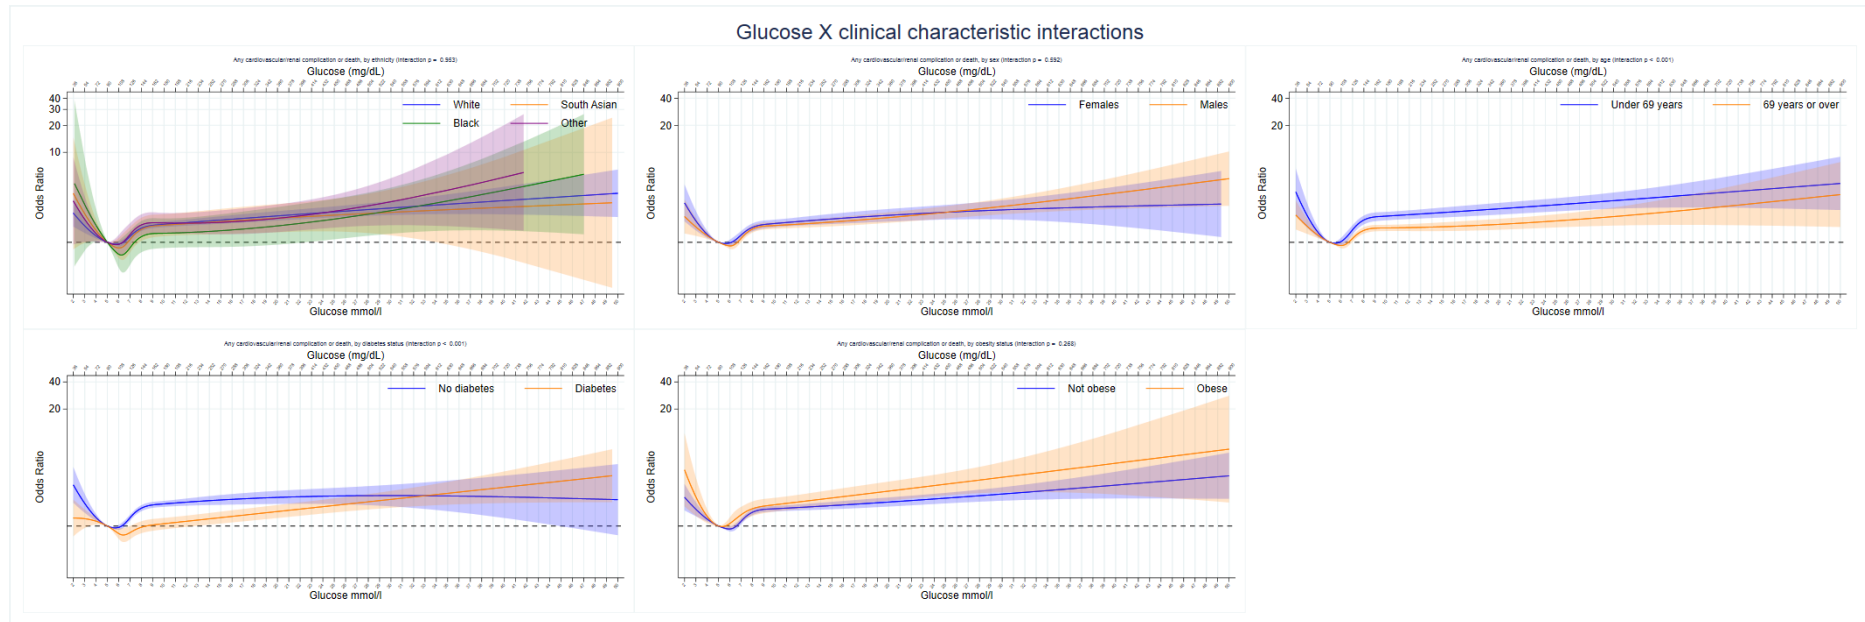

Supplementary Figure 8. Associations between hypo- and hyperglycaemia and 'any cardiovascular/renal complication or death' (adjusted for sex, age, ethnicity, diabetes status, obesity and oxygen saturation)

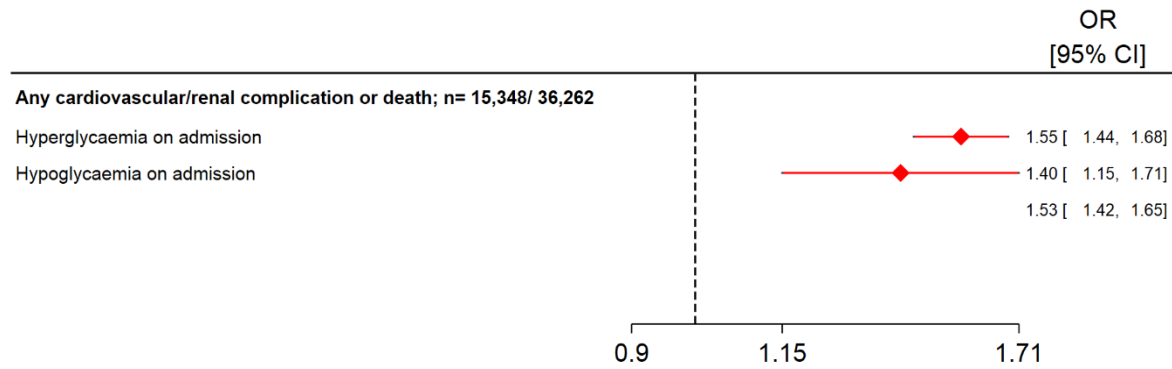

Supplement: Supplementary file 1 [file 34018271]
